# Supplementary material for: Toward the Next Generation of Spine Bioreactors: Validation of an Ex Vivo Intervertebral Disc Organ Model and Customized Specimen Holder for Multiaxial Loading
Source: PubMed Central journal article supplement — ACS Biomater Sci Eng. 2022 Aug 17;8(9):3969–76. doi: 10.1021/acsbiomaterials.2c00330 (PMC9472220; doi:10.1021/acsbiomaterials.2c00330), 2022-08-17
Supplement: ab2c00330_si_001.pdf [file ab2c00330_si_001.pdf]

**Towards the next generation of spine bioreactors: validation of an *ex vivo* intervertebral disc organ model and customized specimen holder for multiaxial loading - Supporting Information**

**Amra Šećerović<sup>1</sup>, Aapo Ristaniemi<sup>1</sup>, Shangbin Cui<sup>1,2</sup>, Zhen Li<sup>1</sup>, Astrid Soubrier<sup>1</sup>, Mauro Alini<sup>1</sup>, Stephen J Ferguson<sup>3</sup>, Gilles Weder<sup>4</sup>, Sarah Heub<sup>4</sup>, Diane Ledroit<sup>4</sup>, Sibylle Grad<sup>1\*</sup>**

<sup>1</sup>AO Research Institute Davos, Clavadelerstrasse 8, 7270 Davos, Switzerland

<sup>2</sup>Guangdong Provincial Key Laboratory of Orthopedics and Traumatology, The First Affiliated Hospital of Sun Yat-sen University, Guangzhou, China

<sup>3</sup>Institute for Biomechanics, ETH Zürich, Zürich, Switzerland

<sup>4</sup>CSEM, Swiss Center for Electronics and Microtechnology, Rue Jaquet-Droz 1, 2002 Neuchatel, Switzerland

\*Corresponding author

PD Dr. Sibylle Grad, PhD

AO Research Institute Davos, Clavadelerstrasse 8, 7270 Davos, Switzerland

Phone: +41 79 390 15 01

Email: [sibylle.grad@aofoundation.org](mailto:sibylle.grad@aofoundation.org)

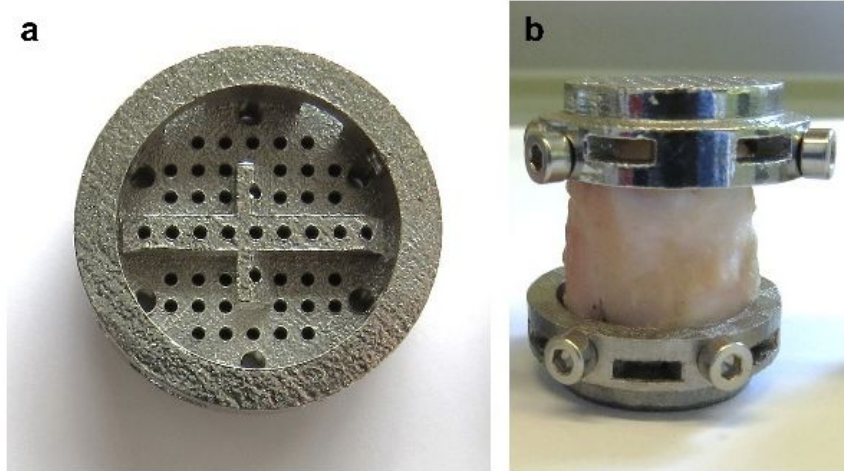

**Figure S1.** Prototype of the specimen holder used in mechanical tests. Images show (a) the specimen holder and (b) the assembly of the holder and intervertebral disc (IVD) specimen tightened with side screws onto the bone.
